# Supplementary material for: The independent and interactive effects of changes in overtime and night shifts during the COVID-19 pandemic on burnout among nurses: a longitudinal study
Source: PubMed Central journal article supplement (PMC11395668; doi:10.5271/sjweh.4176), 2024-09-01
Supplement: SJWEH-50-475-S001.pdf [file SJWEH-50-475-S001.pdf]

# The independent and interactive effects of changes in overtime and night shifts during the COVID-19 pandemic on burnout among nurses: a longitudinal study<sup>1</sup>

Emanuele Maria Giusti, PhD, Giovanni Veronesi, PhD,<sup>2</sup> Francesco Gianfagna, MD, Nicola Magnavita, MD, Francesca Campana, MD, Rossana Borchini, MD, Licia Iacoviello, MD, Marco Mario Ferrario, MDm

1. Supplementary materials
2. Corresponding author: Prof. Giovanni Veronesi, EPIMED Research Center, Department of Medicine and Surgery, University of Insubria, 21100 Varese, Italy. [Email: [giovanni.veronesi@uninsubria.it](mailto:giovanni.veronesi@uninsubria.it)].

**Figure S1.** Distribution of daily overtime (Panel A) and annual number of night shifts (Panel B) in the studied sample of nurses.

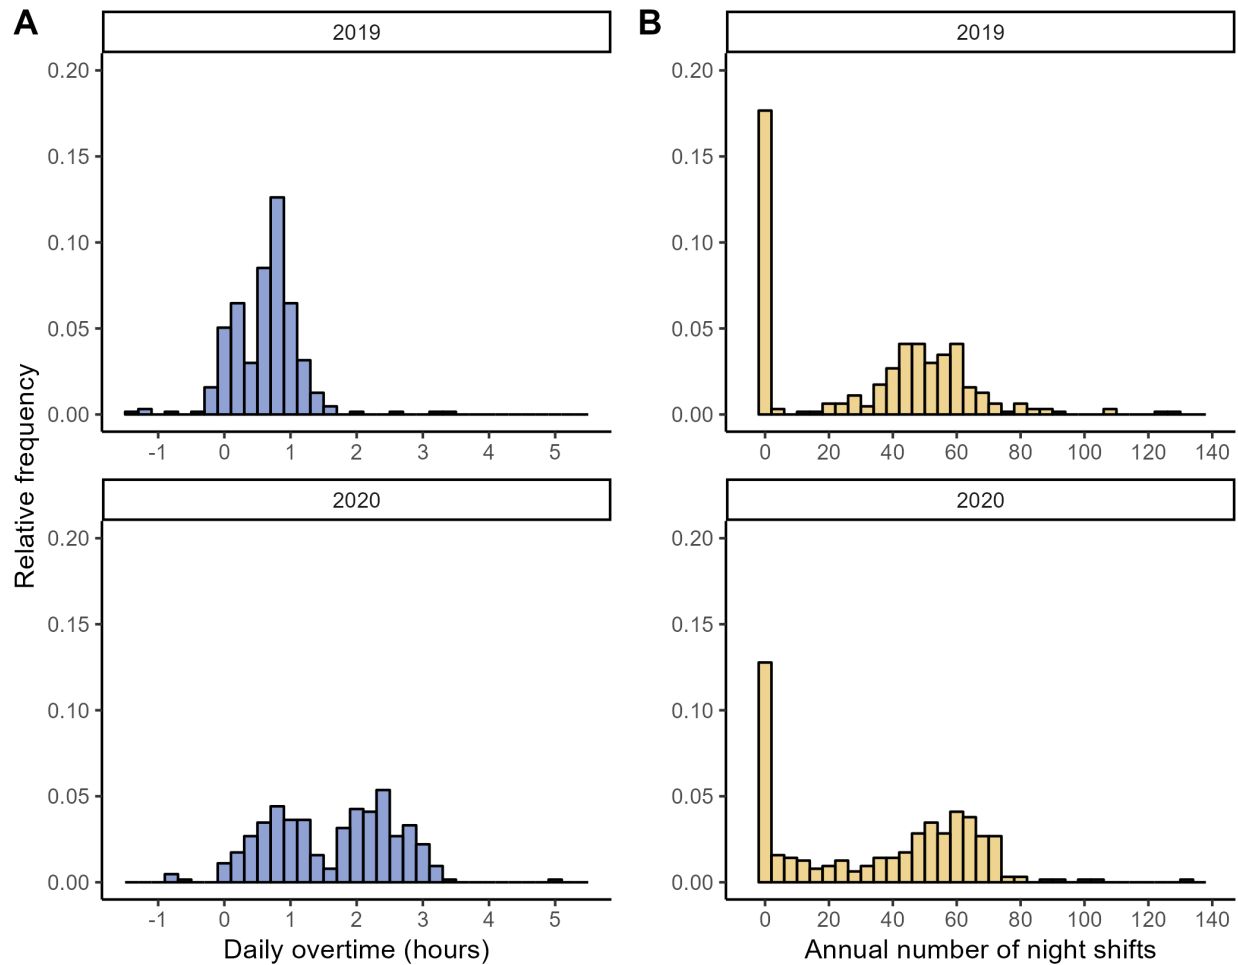

**Table S1.** Comparison of socio-demographic, burnout and work-related variables collected in 2019 between nurses who responded to the 2019 and 2020 survey and nurses who responded to the 2019 survey only.

|                                                                                   | <b>Respondents in<br/>2019 and 2020<br/>(n=346)</b> | <b>Respondents in<br/>2019 only<br/>(n=245)</b> | <b>p-value<sup>a</sup></b> |
|-----------------------------------------------------------------------------------|-----------------------------------------------------|-------------------------------------------------|----------------------------|
| Female sex, No. (%)                                                               | 270 (79.0)                                          | 193 (78.8)                                      | 0.96                       |
| Age, mean (SD)                                                                    | 46.2 (9.5)                                          | 46.4 (10.7)                                     | 0.80                       |
| Full time work in 2019, No. (%)                                                   | 296 (85.6)                                          | 218 (88.9)                                      | 0.22                       |
| Night shift work in 2019, No. (%)                                                 | 215 (62.9)                                          | 139 (56.7)                                      | 0.13                       |
| Number of night shifts in 2019, mean (SD)                                         | 32.9 (29.9)                                         | 30.9 (29.0)                                     | 0.40                       |
| Number of night shifts in 2019 among night shift workers <sup>b</sup> , mean (SD) | 52.2 (16.6)                                         | 53.2 (15.9)                                     | 0.58                       |
| Extra hours per day in 2019, mean (SD)                                            | 0.6 (0.5)                                           | 0.6 (0.5)                                       | 0.39                       |
| Emotional exhaustion 2019 <sup>c</sup> , mean (SD)                                | 19.9 (9.1)                                          | 19.8 (9.5)                                      | 0.85                       |
| Depersonalization 2019 <sup>c</sup> , mean (SD)                                   | 10.4 (5.2)                                          | 9.7 (5.0)                                       | 0.20                       |
| Poor personal accomplishment 2019 <sup>c</sup> , mean (SD)                        | 20.4 (8.6)                                          | 21.5 (9.2)                                      | 0.17                       |

<sup>a</sup> from chi-square tests for categorical variables or t-tests for continuous variables.

<sup>b</sup> night shift workers were 215 among respondents, and 139 among non respondents.

<sup>c</sup> 4 participants had missing data in these variables.

**Table S2.** Results of the linear regression models evaluating the mutually-adjusted effect of the exposure variables on the three burnout dimensions in full-time nurses (n=272).

|                                    | <b>Emotional<br/>exhaustion</b>      | <b>Depersonalization</b>             | <b>Poor Personal<br/>Accomplishment</b> |
|------------------------------------|--------------------------------------|--------------------------------------|-----------------------------------------|
|                                    | <b><math>\beta^a</math> (95% CI)</b> | <b><math>\beta^a</math> (95% CI)</b> | <b><math>\beta^a</math> (95% CI)</b>    |
| <b>Change in overtime</b>          |                                      |                                      |                                         |
| Stable low overtime (SLO)          | Ref                                  | Ref                                  | Ref                                     |
| Stable high overtime (SHO)         | 4.59 (1.08 - 8.14)                   | 1.91 (-0.35 - 4.18)                  | 0.88 (-1.91 - 3.67)                     |
| Onset of high overtime (OHO)       | 4.26 (1.40 - 7.12)                   | 2.25 (0.43 - 4.07)                   | 2.65 (0.40 - 4.91)                      |
| <b>Change in night shifts</b>      |                                      |                                      |                                         |
| No night shifts (NNS)              | Ref                                  | Ref                                  | Ref                                     |
| No increase in night shifts (NINS) | -2.88 (-6.02 - 0.27)                 | -1.73 (-3.74 - 0.28)                 | 1.04 (-1.45 - 3.52)                     |
| Increase in night shifts (INS)     | -4.71 (-7.95 - -1.47)                | -1.25 (-3.32 - 0.81)                 | 0.67 (-1.92 - 3.26)                     |

<sup>a</sup> mean difference compared to the reference category, from linear regression models including age, sex, having worked in a COVID-19 ward, the other exposure variable, and the levels of the corresponding burnout dimension in 2019 (Model 3 in the main text).

<sup>b</sup> from Wald chi-square test with 2 degrees of freedom assessing the null hypothesis of no association between the exposure variable and the relevant burnout dimension.
